# Supplementary material for: Widespread mermithid nematode parasitism of Cretaceous insects
Source: eLife. 2023 Jul 14;12:e86283. doi: 10.7554/eLife.86283 (PMC10348742; doi:10.7554/eLife.86283)
Supplement: Supplementary file 1. [file elife-86283-supp1.xlsx]

## Sheet: Sheet1
Clade	Group	Family	Genus	Species	Host/Lifestyle	Deposit/Locality	Stage/Age	Reference
Dorylaimia	Mermithida	Mermithidae	Cretacimermis Poinar, 2001	Cretacimermis adelphe Luo & Poinar, sp. nov.	Dermaptera	Kachin amber, northern Myanmar	Earliest Cenomanian, mid-Cretaceous	This paper
				Cretacimermis aphidophilus Poinar, 2017	Hemiptera: Burmitaphididae: Caulinus burmitis	Kachin amber, northern Myanmar	Earliest Cenomanian, mid-Cretaceous	This paper
				Cretacimermis calypta Luo & Poinar, sp. nov.	Odonata: Epiophlebioptera: Burmaphlebiidae: Burmaphlebia reifi	Kachin amber, northern Myanmar	Earliest Cenomanian, mid-Cretaceous	Poinar, G.O., Jr., 2017. A mermithid nematode, Cretacimermis aphidophilus sp. n. (Nematoda: Mermithidae), parasitising an aphid (Hemiptera: Burmitaphididae) in Myanmar amber: a 100 million year association. Nematology 19, 509-513.
				Cretacimermis cecidomyiae Luo & Poinar, sp. nov.	Diptera: Culicomorpha: Cecidomyiidae	Kachin amber, northern Myanmar	Earliest Cenomanian, mid-Cretaceous	This paper
				Cretacimermis chironomae Poinar, 2011	Diptera: Chironomidae	Kachin amber, northern Myanmar	Earliest Cenomanian, mid-Cretaceous	Grimaldi, D.A., Engel, M.S., Nascimbene, P.C., 2002. Fossiliferous Cretaceous amber from Myanmar (Burma): its rediscovery, biotic diversity, and paleontological significance. American Museum Novitates 2002, 1-71.; Poinar, G.O., Jr., 2011. The evolutionary history of nematodes: as revealed in stone, amber and mummies. Brill, Amersfoort, the Netherlands, 429 pp.; This paper
				Cretacimermis directa Luo & Poinar, sp. nov.	Orthoptera: Ensifera: Grylloidea	Kachin amber, northern Myanmar	Earliest Cenomanian, mid-Cretaceous	This paper
				Cretacimermis incredibilis Luo & Poinar, sp. nov.	Archeognatha	Kachin amber, northern Myanmar	Earliest Cenomanian, mid-Cretaceous	This paper
				Cretacimermis libani (Poinar, Acra & Acra, 1994) Poinar, 2001	Diptera: Chironomidae	Lebanese amber, southern Lebanese	Barremian, Early Cretaceous	Poinar, G.O., Jr., Acra, A., Acra, F., 1994. Earliest fossil nematode (Mermithidae) in Cretaceous Lebanese amber. Fundamental and Applied Nematology 17, 475-477.; Poinar, 2011
				Cretacimermis longa Luo & Poinar, sp. nov.	Blattodea: Mesoblattinidae	Kachin amber, northern Myanmar	Earliest Cenomanian, mid-Cretaceous	This paper
				Cretacimermis manicapsoci Luo & Poinar, sp. nov.	Psocoptera: Manicapsocidae	Kachin amber, northern Myanmar	Earliest Cenomanian, mid-Cretaceous	This paper
				Cretacimermis perforissi Luo & Poinar, sp. nov.	Hemiptera: Fulgoroidea: Perforissidae	Kachin amber, northern Myanmar	Earliest Cenomanian, mid-Cretaceous	This paper
				Cretacimermis protus Poinar & Buckley, 2006	Diptera: Ceratopogonidae	Kachin amber, northern Myanmar	Earliest Cenomanian, mid-Cretaceous	Poinar, G.O., Jr., Buckley, R., 2006. Nematode (Nematoda: Mermithidae) and hairworm (Nematomorpha: Chordodidae) parasites in Early Cretaceous amber. Journal of Invertebrate Pathology 93, 36-41.; Poinar, G.O., Jr., Sarto i Monteys, V., 2008. Mermithids (Nematoda: Mermithidae) of biting midges (Diptera: Ceratopogonidae): Heleidomermis cataloniensis n. sp. from Culicoides circumscriptus Kieffer in S…
				Cretacimermis psoci Luo & Poinar, sp. nov.	Psocoptera: Compsocidae	Kachin amber, northern Myanmar	Earliest Cenomanian, mid-Cretaceous	This paper
			Heydenius Taylor, 1935	Heydenius antiquus (von Heyden, 1860) Taylor, 1935	Coleoptera: Cerambycidae: Hesthesis immortua	Rhine lignite (brown coal)	Oligocene-Miocene	Von Heyden, C., 1860. Mermis antiqua, ein fossiler Eigeweidewurm. Stettin Entomolisches Zeitschrift 21, 38.; Taylor, A.L., 1935. A review of the fossil nematodes. Proceedings of the Helminthological Society of Washington 2, 47-49.
				Heydenius arachnius Poinar, 2012	Arachnida	Dominican amber, Dominican Republic	Miocene	Poinar, G.O., Jr., 2012. New fossil nematodes in Dominican and Baltic amber. Nematology 14, 483-488.
				Heydenius araneus Poinar, 2000	Arachnida: Thomisidae	Baltic amber, northern Europe	Eocene	Poinar, G.O., Jr., 2000. Heydenius araneus n.sp. (Nematoda: Mermithidae), a parasite of a fossil spider, with an examination of helminths from extant spiders (Arachnida: Araneae). Invertebrate Biology 119, 388-393.
				Heydenius brownii Poinar, 2001	Hemiptera: Fulgoroidea: Achiliidae	Baltic amber, northern Europe	Eocene	Poinar, G.O., Jr., 2001. Heydenius brownii sp. n. (Nematoda: Mermithidae) parasitising a planthopper (Homoptera: Achilidae) in Baltic amber. Nematology 3, 753-757.
				Heydenius cecidomyae Poinar, 2011	Diptera: Cecidomyiidae (gall gnat)	Baltic amber, northern Europe	Eocene	Poinar, G.O., Jr., 2011. The evolutionary history of nematodes: as revealed in stone, amber and mummies. Brill, Amersfoort, the Netherlands, 429 pp.
				Heydenius dipterophilus Poinar, 2011	Diptera: Milichiidae	Dominican amber, Dominican Republic	Miocene	Poinar, G.O., Jr., 2011. The evolutionary history of nematodes: as revealed in stone, amber and mummies. Brill, Amersfoort, the Netherlands, 429 pp.
				Heydenius dominicus Poinar, 1984	Diptera: Culicidae: Culex	Dominican amber, Dominican Republic	Miocene	Poinar, G.O., Jr., 1984. Heydenius dominicus n. sp. (Nematoda: Mermithidae), a fossil parasite from the Dominican Republic. Journal of Nematology 16, 371-375.
				Heydenius formicinus Poinar, 2002	Hymenoptera: Formicidae: Prenolepis henschei	Baltic amber, northern Europe	Eocene	Poinar, G.O., Jr., 2002. First fossil record of nematode parasitism of ants; a 40 million year tale. Parasitology 125, 457-459.
				Heydenius lamprophilus Poinar, 2011	Coleoptera: Lampyridae	Dominican amber, Dominican Republic	Miocene	Poinar, G.O., Jr., 2011. The evolutionary history of nematodes: as revealed in stone, amber and mummies. Brill, Amersfoort, the Netherlands, 429 pp.
				Heydenius matutinus (Menge, 1866) Taylor, 1935	Diptera: Chironomidae	Baltic amber, northern Europe	Eocene	Menge, A., 1866. Ueber ein Rhipidopteron und einige andere im bernstein eingeschlossene tiere. Schriften der Naturforschenden Gesellschaft in Danzig 1, 1-8.; Taylor, A.L., 1935. A review of the fossil nematodes. Proceedings of the Helminthological Society of Washington 2, 47-49.
				Heydenius myrmecophila Poinar, Lachaud, Castillo & Infante, 2006	Hymenoptera: Formicidae: Linepithema sp.	Dominican amber, Dominican Republic	Miocene	Poinar, G.O., Jr., Lachaud, J.-P., Castillo, A., Infante, F., 2006. Recent and fossil nematode parasites (Nematoda: Mermithidae) of Neotropical ants. Journal of Invertebrate Pathology 91, 19-26.
				Heydenius neotropicus Poinar, 2011	Diptera: Chironomidae	Dominican amber, Dominican Republic	Miocene	Poinar, G.O., Jr., 2011. The evolutionary history of nematodes: as revealed in stone, amber and mummies. Brill, Amersfoort, the Netherlands, 429 pp.
				Heydenius phasmatophilus Poinar, 2012	Phasmatodea: Phasmatidae: Balticophasma sp.	Baltic amber, northern Europe	Eocene	Poinar, G.O., Jr., 2012. New fossil nematodes in Dominican and Baltic amber. Nematology 14, 483-488.
				Heydenius podenasae Poinar, 2012	Lepidoptera	Baltic amber, northern Europe	Eocene	Poinar, G.O., Jr., 2012. New fossil nematodes in Dominican and Baltic amber. Nematology 14, 483-488.
				Heydenius psychodae Poinar, 2011	Diptera: Psychodidae	Dominican amber, Dominican Republic	Miocene	Poinar, G.O., Jr., 2011. The evolutionary history of nematodes: as revealed in stone, amber and mummies. Brill, Amersfoort, the Netherlands, 429 pp.
				Heydenius quadristriatus (Menge, 1872) Taylor, 1935	Unknown	Baltic amber, northern Europe	Eocene	Menge, A., 1872. Ueber eine im Bernstein eingeschlossene Mermis. Schriften der Naturforschenden Gesellschaft in Danzig 3, 1-2.; Taylor, A.L., 1935. A review of the fossil nematodes. Proceedings of the Helminthological Society of Washington 2, 47-49.
				Heydenius saprophilus Poinar, 2011	Diptera: Anisopodidae	Dominican amber, Dominican Republic	Miocene	Poinar, G.O., Jr., 2011. The evolutionary history of nematodes: as revealed in stone, amber and mummies. Brill, Amersfoort, the Netherlands, 429 pp.
				Heydenius scatophilus Poinar, 2011	Diptera: Scatopsidae	Dominican amber, Dominican Republic	Miocene	Poinar, G.O., Jr., 2011. The evolutionary history of nematodes: as revealed in stone, amber and mummies. Brill, Amersfoort, the Netherlands, 429 pp.
				Heydenius sciarophilus Poinar, 2011	Diptera: Sciaridae	Baltic amber, northern Europe	Eocene	Poinar, G.O., Jr., 2011. The evolutionary history of nematodes: as revealed in stone, amber and mummies. Brill, Amersfoort, the Netherlands, 429 pp.
				Heydenius simulphilus Poinar & Currie, 2019	Diptera: Simuliidae: Greniera afﬁnis	Baltic amber, northern Europe	Eocene	Poinar, G.O., Jr., Currie, D.C., 2019. Mermithid nematode (Nematoda: Mermithidae) parasites of a fossil black fly (Diptera: Simuliidae) in Baltic amber. Nematology 22, 655-658.
				Heydenius tabanae Poinar, 2011	Diptera: Tabanidae: Tabanus sudeticus	Willershausen, Kreis Osterode, Germany	Late Pliocene	Grabenhorst, H., 1985. Eine zweite bremse (Tabanidae) zusammen mit ihrem Parasiten (Nematoda, Mermithoidae) aus dem oberpliozän von Willershausen, Krs. Osterode Aufschluss 36, 325-328.; Poinar, G.O., Jr., 2011. The evolutionary history of nematodes: as revealed in stone, amber and mummies. Brill, Amersfoort, the Netherlands, 429 pp.
				Heydenius trichorosus Poinar, 2012	Trichoptera: Leptoceridae: Triaenodes balticus	Baltic amber, northern Europe	Eocene	Poinar, G.O., Jr., 2012. New fossil nematodes in Dominican and Baltic amber. Nematology 14, 483-488.
		Tetradonematidae	Myrmeconema Poinar & Yanoviak, 2008	Myrmeconema antiqua Poinar, 2011	Hymenoptera: Formicidae: Cephalotes serratus	Dominican amber, Dominican Republic	Miocene	Poinar, G.O., Jr., 2011. The evolutionary history of nematodes: as revealed in stone, amber and mummies. Brill, Amersfoort, the Netherlands, 429 pp.
			Palaeotetradonema Poinar, 2011	Palaeotetradonema phlebotomae Poinar, 2011	Diptera: Phlebotomidae	Mexican amber, Chiapas, Mexico	Early Miocene	Poinar, G.O., Jr., 2011. The evolutionary history of nematodes: as revealed in stone, amber and mummies. Brill, Amersfoort, the Netherlands, 429 pp.
				Palaeotetradonema sciarae Poinar, 2011	Diptera: Sciaridae	Baltic amber, northern Europe	Eocene	Poinar, G.O., Jr., 2011. The evolutionary history of nematodes: as revealed in stone, amber and mummies. Brill, Amersfoort, the Netherlands, 429 pp.
Enoplia	Enoplida	Palaeoenoploididae	Palaeoenoploides Mattavelli & Bracchi, 2008	Palaeoenoploides alessandrellianus Mattavelli & Bracchi, 2008	Free-living marine predator	Haqel, Lebanon	Late Cretaceous	Mattavelli, A., Bracchi, G., 2008. Palaeoenoploides alessandrellianus n. gen. n. sp: a Late Cenomanian 'roundworm' from the Upper Cretaceous of Lebanon (Nematoda: Enoplidae). Atti della Società italiana di scienze naturali e del museo civico di storia naturale di Milano 149, 179-194.
		Palaeonematidae	Palaeonema Poinar, Kerp & Hass, 2008	Palaeonema phyticum Poinar, Kerp & Hass, 2008	Land plant, Aglaophyton major	Rhynie Chert, Aberdeen, Scotland	Early Devonian	Poinar, G.O., Jr., Kerp, H., Hass, H., 2008. Palaeonema phyticum gen. n., sp. n. (Nematoda: Palaeonematidae fam. n.), a Devonian nematode associated with early land plants. Nematology 10, 9-14.
Chromadoria	Chromadorida	Nemavermidae	Nemavermes Schram, 1973	Nemavermes mackeei Schram, 1973	Deposit feeders	Carbondale Formation, Illinois/Bear Gulch Limestone, central Montana	Bashkirian/Moscovian, Pennsylvanian, Carboniferous	Schram, F.R., 1973. Pseudocoelomates and a Nemertine from the Illinois Pennsylvanian. Journal of Paleontology 47, 985-989.; Schram, F.R., 1979. Worms of the Mississippian Bear Gulch Limestone of central Montana, USA. Transactions of the San Diego Society of Natural History 19, 107-120.; Poinar, G.O., Jr., 2011. The evolutionary history of nematodes: as revealed in stone, amber and mummies. Brill,…
	Desmodorida	Eophasmidae	Eophasma Arduini, Pinna & Teruzzi, 1983	Eophasma jurasicum Arduini, Pinna & Teruzzi, 1983	Free-living marine nematode	Como, Italy	Early Sinemurian, Early Jurassic	Arduini, P., Pinna, G., Teruzzi, G., 1983. Eophasma jurassicum n. g., n. sp., a new fossil nematode of the Sinemurian of Osteno in Lombardy. Atti della Società italiana di scienze naturali e del museo civico di storia naturale di Milano 124, 61-64.; Poinar, G.O., Jr., 2011. The evolutionary history of nematodes: as revealed in stone, amber and mummies. Brill, Amersfoort, the Netherlands, 429 pp.
	Plectida	Captivonemidae	Captivonema Boström, 1994	Captivonema cretacea Boström, 1994	Free-living freshwater nematode	Helvetiafjellet Formation, Spitsbergen, Norway	Barremian, Early Cretaceous	Manum, S.B., Bose, M.N., Sayer, R.T., Boström, S., 1994. A nematode (Captivonema cretacea gen. et sp. n.) preserved in a clitellate cocoon wall from the Early Cretaceous. Zoologica Scripta 23, 27-31.; Poinar, G.O., Jr., 2011. The evolutionary history of nematodes: as revealed in stone, amber and mummies. Brill, Amersfoort, the Netherlands, 429 pp.
		Plectidae	Oligoplectus Taylor, 1935	Oligoplectus succini Taylor, 1935	Unknown	Baltic amber, northern Europe	Eocene	von Duisburg, H., 1862. Beitrag zur Bernstein-Fauna. Schriften der Königlichen Physikalisch-Ökonomischen Gesellschaft zu Königsbergen 3, 31-36.; Taylor, A.L., 1935. A review of the fossil nematodes. Proceedings of the Helminthological Society of Washington 2, 47-49.
Chromadoria: Rhabditida: Spirurina	Oxyuridomorpha	Filariidae	Cascoﬁlaria Poinar, 2011	Cascoﬁlaria baltica Poinar, 2011	Diptera: Simuliidae	Baltic amber, northern Europe	Eocene	Poinar, G.O., Jr., 2011. The evolutionary history of nematodes: as revealed in stone, amber and mummies. Brill, Amersfoort, the Netherlands, 429 pp.
				Cascoﬁlaria dominicana Poinar, 2011	Diptera: Culicidae: Culex sp.	Dominican amber, Dominican Republic	Miocene	Poinar, G.O., Jr., 2011. The evolutionary history of nematodes: as revealed in stone, amber and mummies. Brill, Amersfoort, the Netherlands, 429 pp.
				Cascoﬁlaria parva Poinar, 2011	Diptera: Culicidae: Culex sp.	Dominican amber, Dominican Republic	Miocene	Poinar, G.O., Jr., 2011. The evolutionary history of nematodes: as revealed in stone, amber and mummies. Brill, Amersfoort, the Netherlands, 429 pp.
		Heteroxynematidae	Paleoxyuris Hugot et al., 2014	Paleoxyuris cockburni Hugot et al., 2014	Stem-group of the mammal, Synapsida: Cynodontia	Rio Grande do Sul State, Brazil	Middle Triassic	Hugot, J.-P., Gardner, S.L., Borba, V., Araujo, P., Leles, D., Stock Da-Rosa, Á.A., Dutra, J., Ferreira, L.F., Araújo, A., 2014. Discovery of a 240 million year old nematode parasite egg in a cynodont coprolite sheds light on the early origin of pinworms in vertebrates. Parasites & Vectors 7, 486.
		Thelastomatidae	Paleothelastoma Poinar, 2011	Paleothelastoma tipulae Poinar, 2011	Diptera: Limoniidae: Gonomyia	Kachin amber, northern Myanmar	Earliest Cenomanian, mid-Cretaceous	Poinar, G.O., Jr., 2011. The evolutionary history of nematodes: as revealed in stone, amber and mummies. Brill, Amersfoort, the Netherlands, 429 pp.
	Ascaridomorpha	Ascarididae	Ascarites Poinar & Boucot, 2006	Ascarites priscus Poinar & Boucot, 2006	Predatory dinosaur, Megalosaurus sp.	Bernissart Wealden Iguanodon shaft, Belgium	Early Cretaceous	Poinar, G.O., Jr., Boucot, A.J., 2006. Evidence of intestinal parasites of dinosaurs. Parasitology 133, 245-249.
				Ascarites gerus Poinar & Boucot, 2006	Predatory dinosaur, Megalosaurus sp.	Bernissart Wealden Iguanodon shaft, Belgium	Early Cretaceous	Poinar, G.O., Jr., Boucot, A.J., 2006. Evidence of intestinal parasites of dinosaurs. Parasitology 133, 245-249.
				Ascarites rufferi Silva et al., 2014	Stem-group of the mammal, Synapsida: Cynodontia	Rio Grande do Sul State, Brazil	Middle Triassic	Da Silva, P.A., Borba, V.H., Dutra, J.M.F., Leles, D., Da-Rosa, A.A.S., Ferreira, L.F., Araujo, A., 2014. A new ascarid species in cynodont coprolite dated of 240 million years. Anais da Academia Brasileira de Ciências 86, 265-270.
		Cosmocercidae	Palaeocosmocerca Poinar, 2011	Palaeocosmocerca burmanica Poinar, 2011	Mollusca: Gastropoda: Punctidae	Kachin amber, northern Myanmar	Earliest Cenomanian, mid-Cretaceous	Poinar, G.O., Jr., 2011. The evolutionary history of nematodes: as revealed in stone, amber and mummies. Brill, Amersfoort, the Netherlands, 429 pp.
		Heterocheilidae	Bauruascaris Cardia et al., 2019	Bauruascaris adamantinensis Cardia et al., 2019	Reptilia: Crocodyliformes	Adamantina Formation, São Paulo, Brazil	Campanian/Maastrichtian, Late Cretaceous	Cardia, D.F.F., Bertini, R.J., Camossi, L.G., Letizio, L.A., 2019. Two new species of ascaridoid nematodes in Brazilian Crocodylomorpha from the Upper Cretaceous. Parasitology International 72, 101947.
				Bauruascaris cretacicus Cardia et al., 2019	Reptilia: Crocodyliformes	Adamantina Formation, São Paulo, Brazil	Campanian/Maastrichtian, Late Cretaceous	Cardia, D.F.F., Bertini, R.J., Camossi, L.G., Letizio, L.A., 2019. Two new species of ascaridoid nematodes in Brazilian Crocodylomorpha from the Upper Cretaceous. Parasitology International 72, 101947.
Chromadoria: Rhabditida: Tylenchina	Tylenchomorpha	Acugutturidae	Setonema Poinar, 2011	Setonema protera Poinar, 2011	Lepidoptera	Dominican amber, Dominican Republic	Miocene	Poinar, G.O., Jr., 2011. The evolutionary history of nematodes: as revealed in stone, amber and mummies. Brill, Amersfoort, the Netherlands, 429 pp.
		Allantonematidae	Howardula Cobb, 1921	Howardula helenoschini Poinar, 2003	Diptera: Phoridae: Triphleba	Baltic amber, northern Europe	Eocene	Poinar, G.O., Jr., 2003. Fossil evidence of phorid parasitism (Diptera: Phoridae) by allantonematid nematodes (Tylenchida: Allantonematidae). Parasitology 127, 589-592.
		Anguinidae	Palaeoanguina Poinar, 2011	Palaeoanguina dominicana Poinar, 2011	Immature monocot seed	Dominican amber, Dominican Republic	Miocene	Poinar, G.O., Jr., 2011. The evolutionary history of nematodes: as revealed in stone, amber and mummies. Brill, Amersfoort, the Netherlands, 429 pp.
		Aphelenchoididae	Bursaphelenchus Poinar, 2011	Bursaphelenchus similus Poinar, 2011	Fungi growing in the gallery of the platypodid beetle	Dominican amber, Dominican Republic	Miocene	Poinar, G.O., Jr., 2011. The evolutionary history of nematodes: as revealed in stone, amber and mummies. Brill, Amersfoort, the Netherlands, 429 pp.
			Chalcidonema Poinar, 2011	Chalcidonema paradoxa Poinar, 2011	Hymenoptera: Chalcidoidea: Pteromalidae?	Dominican amber, Dominican Republic	Miocene	Poinar, G.O., Jr., 2011. The evolutionary history of nematodes: as revealed in stone, amber and mummies. Brill, Amersfoort, the Netherlands, 429 pp.
			Cretaciaphelenchoides Poinar, 2011	Cretaciaphelenchoides burmensis Poinar, 2011	Unidentiﬁed fungus	Kachin amber, northern Myanmar	Earliest Cenomanian, mid-Cretaceous	Poinar, G.O., Jr., 2011. The evolutionary history of nematodes: as revealed in stone, amber and mummies. Brill, Amersfoort, the Netherlands, 429 pp.
			Cryptaphelenchus Fuchs, 1937	Cryptaphelenchus dominicus Poinar, 2011	Coleoptera: Platypodidae	Dominican amber, Dominican Republic	Miocene	Poinar, G.O., Jr., 2011. The evolutionary history of nematodes: as revealed in stone, amber and mummies. Brill, Amersfoort, the Netherlands, 429 pp.
			Oligaphelenchoides Poinar, 1977	Oligaphelenchoides atrebora Poinar, 1977	Mycelium of unknown fungus	Mexican amber, Chiapas, Mexico	Early Miocene	Poinar, G.O., Jr., 1977. Fossil nematodes from Mexican amber. Nematologica 23, 232–238.
				Oligaphelenchoides dominicanus Poinar, 2011	Mat of fungal hyphae	Dominican amber, Dominican Republic	Miocene	Poinar, G.O., Jr., 2011. The evolutionary history of nematodes: as revealed in stone, amber and mummies. Brill, Amersfoort, the Netherlands, 429 pp.
				Oligaphelenchoides maximus Poinar, 2011	Rootlet or root hair of a monocot	Dominican amber, Dominican Republic	Miocene	Poinar, G.O., Jr., 2011. The evolutionary history of nematodes: as revealed in stone, amber and mummies. Brill, Amersfoort, the Netherlands, 429 pp.
			Palaeoaphelenchoides Poinar, 2011	Palaeoaphelenchoides balticus Poinar, 2011	Free living but probably mycetophagous	Baltic amber, northern Europe	Eocene	Poinar, G.O., Jr., 2011. The evolutionary history of nematodes: as revealed in stone, amber and mummies. Brill, Amersfoort, the Netherlands, 429 pp.
		Iotonchidae	Paleoiotonchium Poinar, 2011	Paleoiotonchium dominicanum Poinar, 2011	Diptera: Mycetophilidae: Xylophilini	Dominican amber, Dominican Republic	Miocene	Poinar, G.O., Jr., 2011. The evolutionary history of nematodes: as revealed in stone, amber and mummies. Brill, Amersfoort, the Netherlands, 429 pp.
			Palaeoallantonema Poinar, 2011	Palaeoallantonema apionae Poinar, 2011	Coleoptera: Apionidae	Dominican amber, Dominican Republic	Miocene	Poinar, G.O., Jr., 2011. The evolutionary history of nematodes: as revealed in stone, amber and mummies. Brill, Amersfoort, the Netherlands, 429 pp.
				Palaeoallantonema baltica Poinar, 2011	Coleoptera: Staphylinidae	Baltic amber, northern Europe	Eocene	Poinar, G.O., Jr., 2011. The evolutionary history of nematodes: as revealed in stone, amber and mummies. Brill, Amersfoort, the Netherlands, 429 pp.
				Palaeoallantonema cephalotae Poinar, 2011	Hymenoptera: Formicidae: Cephalotes serratus	Dominican amber, Dominican Republic	Miocene	Poinar, G.O., Jr., 2011. The evolutionary history of nematodes: as revealed in stone, amber and mummies. Brill, Amersfoort, the Netherlands, 429 pp.
				Palaeoallantonema dominicana Poinar, 2011	Coleoptera: Staphylinidae: Neoxantholinus	Dominican amber, Dominican Republic	Miocene	Poinar, G.O., Jr., 2011. The evolutionary history of nematodes: as revealed in stone, amber and mummies. Brill, Amersfoort, the Netherlands, 429 pp.
				Palaeoallantonema phlebotomae Poinar, 2011	Diptera: Phlebotomidae: Lutzomyia	Dominican amber, Dominican Republic	Miocene	Poinar, G.O., Jr., 2011. The evolutionary history of nematodes: as revealed in stone, amber and mummies. Brill, Amersfoort, the Netherlands, 429 pp.
				Palaeoallantonema zygopinae Poinar, 2011	Coleoptera: Curculionidae: Zygopinae	Dominican amber, Dominican Republic	Miocene	Poinar, G.O., Jr., 2011. The evolutionary history of nematodes: as revealed in stone, amber and mummies. Brill, Amersfoort, the Netherlands, 429 pp.
		Panagrolaimidae	Panagrolaimus Fuchs, 1930	Panagrolaimus neotropicus Poinar, 2011	Coleoptera: Platypodidae: Cenocephalus	Dominican amber, Dominican Republic	Miocene	Poinar, G.O., Jr., 2011. The evolutionary history of nematodes: as revealed in stone, amber and mummies. Brill, Amersfoort, the Netherlands, 429 pp.
		Parasitylenchidae	Palaeoparasitylenchus Poinar, 2011	Palaeoparasitylenchus balticus Poinar & Brown, 2021	Diptera: Dolichopodidae: Gheynia	Baltic amber, northern Europe	Eocene	Poinar, G.O., Jr., Brown, A.E., 2021. Palaeoparasitylenchus balticus n. sp. (Nematoda: Parasitylenchidae), a nematode parasite of a long-legged fly (Diptera: Dolichopodidae) in Baltic amber. Nematology 23, 1211-1214.
				Palaeoparasitylenchus dominicanus Poinar, 2011	Diptera: Drosophilidae: Chymomyza primavera	Dominican amber, Dominican Republic	Miocene	Poinar, G.O., Jr., 2011. The evolutionary history of nematodes: as revealed in stone, amber and mummies. Brill, Amersfoort, the Netherlands, 429 pp.
		Sphaerulariidae	Tripius Chitwood, 1935	Tripius balticus Poinar, 2011	Diptera: Sciaridae	Baltic amber, northern Europe	Eocene	Poinar, G.O., Jr., 2011. The evolutionary history of nematodes: as revealed in stone, amber and mummies. Brill, Amersfoort, the Netherlands, 429 pp.
Chromadoria: Rhabditida: Rhabditina	Diplogasteromorpha	Diplogasteridae	Apiﬁlaria Poinar, 2011	Apiﬁlaria proplebiae Poinar, 2011	Hymenoptera: Apidae	Dominican amber, Dominican Republic	Miocene	Poinar, G.O., Jr., 2011. The evolutionary history of nematodes: as revealed in stone, amber and mummies. Brill, Amersfoort, the Netherlands, 429 pp.
			Chilonema Poinar, 2011	Chilonema ﬁlaforma Poinar, 2011	Scutigeromorpha: Chilopoda: Scutigeridae	Dominican amber, Dominican Republic	Miocene	Poinar, G.O., Jr., 2011. The evolutionary history of nematodes: as revealed in stone, amber and mummies. Brill, Amersfoort, the Netherlands, 429 pp.
			Cretodiplogaster Poinar, 2011	Cretodiplogaster termitophilus Poinar, 2011	Isoptera: Kalotermitidae: Kalotermes burmensis	Kachin amber, northern Myanmar	Earliest Cenomanian, mid-Cretaceous	Poinar, G.O., Jr., 2011. The evolutionary history of nematodes: as revealed in stone, amber and mummies. Brill, Amersfoort, the Netherlands, 429 pp.
			Diplonema Poinar, 2011	Diplonema minuta Poinar, 2011	Diplopoda: Polydesmidae	Dominican amber, Dominican Republic	Miocene	Poinar, G.O., Jr., 2011. The evolutionary history of nematodes: as revealed in stone, amber and mummies. Brill, Amersfoort, the Netherlands, 429 pp.
			Filotermes Poinar, 2011	Filotermes minutus Poinar, 2011	Isoptera: Hodotermitidae	Dominican amber, Dominican Republic	Miocene	Poinar, G.O., Jr., 2011. The evolutionary history of nematodes: as revealed in stone, amber and mummies. Brill, Amersfoort, the Netherlands, 429 pp.
			Oligodiplogaster Poinar, 1977	Oligodiplogaster antiqua Poinar, 1977	Free-living	Mexican amber, Chiapas, Mexico	Early Miocene	Poinar, G.O., Jr., 1977. Fossil nematodes from Mexican amber. Nematologica 23, 232–238.
			Palaeodiplogaster Poinar, 2011	Palaeodiplogaster brentiphila Poinar, 2011	Coleoptera: Brentidae: Dominibrentus leptus	Dominican amber, Dominican Republic	Miocene	Poinar, G.O., Jr., 2011. The evolutionary history of nematodes: as revealed in stone, amber and mummies. Brill, Amersfoort, the Netherlands, 429 pp.
			Formicodiplogaster Poinar, 2011	Formicodiplogaster myrmenema Poinar, 2011	Hymenoptera: Formicidae: Azteca	Dominican amber, Dominican Republic	Miocene	Poinar, G.O., Jr., 2011. The evolutionary history of nematodes: as revealed in stone, amber and mummies. Brill, Amersfoort, the Netherlands, 429 pp.
			Scarabinema Poinar, 2011	Scarabinema minuta Poinar, 2011	Coleoptera: Scarabaeidae	Dominican amber, Dominican Republic	Miocene	Poinar, G.O., Jr., 2011. The evolutionary history of nematodes: as revealed in stone, amber and mummies. Brill, Amersfoort, the Netherlands, 429 pp.
			Scolytonema Poinar, 2011	Scolytonema dominicana Poinar, 2011	Coleoptera: Scolytidae: Scolytus poinari/Coleoptera: Platypodidae: Cenocephalus rhinoceroide	Dominican amber, Dominican Republic	Miocene	Poinar, G.O., Jr., 2011. The evolutionary history of nematodes: as revealed in stone, amber and mummies. Brill, Amersfoort, the Netherlands, 429 pp.
				Scolytonema hispaniolae Poinar, 2011	Coleoptera: Platypodidae	Dominican amber, Dominican Republic	Miocene	Poinar, G.O., Jr., 2011. The evolutionary history of nematodes: as revealed in stone, amber and mummies. Brill, Amersfoort, the Netherlands, 429 pp.
				Scolytonema mexicana Poinar, 2011	Coleoptera: Platypodidae	Mexican amber, Chiapas, Mexico	Early Miocene	Poinar, G.O., Jr., 2011. The evolutionary history of nematodes: as revealed in stone, amber and mummies. Brill, Amersfoort, the Netherlands, 429 pp.
			Syconema Poinar, 2011	Syconema dominicana Poinar, 2011	Hymenoptera: Agaonidae	Dominican amber, Dominican Republic	Miocene	Poinar, G.O., Jr., 2011. The evolutionary history of nematodes: as revealed in stone, amber and mummies. Brill, Amersfoort, the Netherlands, 429 pp.
	Rhabditomorpha	Rhabditidae	Palaeoarachnus Poinar, 2011	Palaeoarachnus balticus Poinar, 2011	Arachnida: Trechaleidae: Eotrechalea annulata	Baltic amber, northern Europe	Eocene	Poinar, G.O., Jr., 2011. The evolutionary history of nematodes: as revealed in stone, amber and mummies. Brill, Amersfoort, the Netherlands, 429 pp.
			Crustaﬁla Poinar, 2011	Crustaﬁla conﬁna Poinar, 2011	Isopoda: Philosciidae	Dominican amber, Dominican Republic	Miocene	Poinar, G.O., Jr., 2011. The evolutionary history of nematodes: as revealed in stone, amber and mummies. Brill, Amersfoort, the Netherlands, 429 pp.
			Palaeorhabditis Poinar, 2011	Palaeorhabditis balticus Poinar, 2011	Coleoptera	Baltic amber, northern Europe	Eocene	Poinar, G.O., Jr., 2011. The evolutionary history of nematodes: as revealed in stone, amber and mummies. Brill, Amersfoort, the Netherlands, 429 pp.
			Prescaﬁlotermes Poinar, 2011	Prescaﬁlotermes dominicanus Poinar, 2011	Isoptera: Hodotermitidae, Kalotermitidae, Rhinotermitidae	Dominican amber, Dominican Republic	Miocene	Poinar, G.O., Jr., 2011. The evolutionary history of nematodes: as revealed in stone, amber and mummies. Brill, Amersfoort, the Netherlands, 429 pp.
				Prescaﬁlotermes elongatus Poinar, 2011	Isoptera: Termitidae: Nausutitermes sp.	Dominican amber, Dominican Republic	Miocene	Poinar, G.O., Jr., 2011. The evolutionary history of nematodes: as revealed in stone, amber and mummies. Brill, Amersfoort, the Netherlands, 429 pp.
			Psocidonema Poinar, 2011	Psocidonema dominicana Poinar, 2011	Psocoptera	Dominican amber, Dominican Republic	Miocene	Poinar, G.O., Jr., 2011. The evolutionary history of nematodes: as revealed in stone, amber and mummies. Brill, Amersfoort, the Netherlands, 429 pp.
			Psychodorhabditis Poinar, 2011	Psychodorhabditis attenuatus Poinar, 2011	Diptera: Psychodidae	Dominican amber, Dominican Republic	Miocene	Poinar, G.O., Jr., 2011. The evolutionary history of nematodes: as revealed in stone, amber and mummies. Brill, Amersfoort, the Netherlands, 429 pp.
				Psychodorhabditis balticus Poinar, 2011	Diptera: Psychodidae	Baltic amber, northern Europe	Eocene	Poinar, G.O., Jr., 2011. The evolutionary history of nematodes: as revealed in stone, amber and mummies. Brill, Amersfoort, the Netherlands, 429 pp.
				Psychodorhabditis dominicanus Poinar, 2011	Diptera: Psychodidae	Dominican amber, Dominican Republic	Miocene	Poinar, G.O., Jr., 2011. The evolutionary history of nematodes: as revealed in stone, amber and mummies. Brill, Amersfoort, the Netherlands, 429 pp.
			Tipulacomis Poinar, 2011	Tipulacomis balticus Poinar, 2011	Diptera: Limoniidae	Baltic amber, northern Europe	Eocene	Poinar, G.O., Jr., 2011. The evolutionary history of nematodes: as revealed in stone, amber and mummies. Brill, Amersfoort, the Netherlands, 429 pp.
				Tipulacomis dominicanus Poinar, 2011	Diptera: Limoniidae: Dicranomyia	Dominican amber, Dominican Republic	Miocene	Poinar, G.O., Jr., 2011. The evolutionary history of nematodes: as revealed in stone, amber and mummies. Brill, Amersfoort, the Netherlands, 429 pp.
		Heterorhabditidae	Proheterorhabditis Poinar, 2011	Proheterorhabditis burmanicus Poinar, 2011	Coleoptera: Staphylinidae?	Kachin amber, northern Myanmar	Earliest Cenomanian, mid-Cretaceous	Poinar, G.O., Jr., 2011. The evolutionary history of nematodes: as revealed in stone, amber and mummies. Brill, Amersfoort, the Netherlands, 429 pp.
Genera without systematic position			Copalonema Poinar, 2011	Copalonema colombiana Poinar, 2011	Free living on the bark of trees	Magdalena River valley in Colombia, South America	10 to 500 years	Poinar, G.O., Jr., 2011. The evolutionary history of nematodes: as revealed in stone, amber and mummies. Brill, Amersfoort, the Netherlands, 429 pp.
			Vetus Taylor, 1935	Vetus capillaceus Taylor, 1935	Free-living	Baltic amber, northern Europe	Eocene	Menge, A., 1866. Ueber ein Rhipidopteron und einige andere im bernstein eingeschlossene tiere. Schriften der Naturforschenden Gesellschaft in Danzig 1, 1-8.; Taylor, A.L., 1935. A review of the fossil nematodes. Proceedings of the Helminthological Society of Washington 2, 47-49.
				Vetus duisburgi Taylor, 1935	Free-living	Baltic amber, northern Europe	Eocene	Taylor, A.L., 1935. A review of the fossil nematodes. Proceedings of the Helminthological Society of Washington 2, 47-49.
				Vetus elongatus Poinar, 2011	Free-living	Dominican amber, Dominican Republic	Miocene	Poinar, G.O., Jr., 2011. The evolutionary history of nematodes: as revealed in stone, amber and mummies. Brill, Amersfoort, the Netherlands, 429 pp.
				Vetus libani Poinar, 2011	Free-living	Lebanese amber, southern Lebanese	Barremian, Early Cretaceous	Poinar, G.O., Jr., 2011. The evolutionary history of nematodes: as revealed in stone, amber and mummies. Brill, Amersfoort, the Netherlands, 429 pp.
				Vetus maximus Poinar, 2011	Free-living	Dominican amber, Dominican Republic	Miocene	Poinar, G.O., Jr., 2011. The evolutionary history of nematodes: as revealed in stone, amber and mummies. Brill, Amersfoort, the Netherlands, 429 pp.
				Vetus microcosmus Poinar, 2011	Free-living	Dominican amber, Dominican Republic	Miocene	Poinar, G.O., Jr., 2011. The evolutionary history of nematodes: as revealed in stone, amber and mummies. Brill, Amersfoort, the Netherlands, 429 pp.
				Vetus pristinus Taylor, 1935	Free-living	Baltic amber, northern Europe	Eocene	Menge, A., 1866. Ueber ein Rhipidopteron und einige andere im bernstein eingeschlossene tiere. Schriften der Naturforschenden Gesellschaft in Danzig 1, 1-8.; Taylor, A.L., 1935. A review of the fossil nematodes. Proceedings of the Helminthological Society of Washington 2, 47-49.
				Vetus robustus Poinar, 1977	Free-living	Mexican amber, Chiapas, Mexico	Early Miocene	Poinar, G.O., Jr., 1977. Fossil nematodes from Mexican amber. Nematologica 23, 232–238.
